# Supplementary material
Source: publisher figshare collection journal article supplement (https://acs.figshare.com/ndownloader/files/4191547)
Supplement: Supplementary file 1 [file 4191547]

Supplemental Material for:

Importance of Halogen...Halogen Contacts for the  
Structural and Magnetic Properties of  
 $\text{CuX}_2(\text{pyrazine-}N,N'\text{-dioxide})(\text{H}_2\text{O})_2$  ( $X = \text{Cl} \text{ \& \; Br}$ )

*John A. Schlueter,<sup>a,\*</sup> Hyunsoo Park,<sup>a</sup> Gregory J. Halder,<sup>a</sup> William R. Armand,<sup>a</sup> Cortney Dunmars,<sup>a</sup>  
Karena W. Chapman,<sup>b</sup> Jamie L. Manson,<sup>c</sup> John Singleton,<sup>d</sup> Ross McDonald,<sup>d</sup> Alex Plonczak,<sup>d</sup> Jinhee  
Kang,<sup>e</sup> Chaghoon Lee,<sup>e</sup> Myung-Hwan Whangbo,<sup>e</sup> Tom Lancaster,<sup>f</sup> Andrew J. Steele,<sup>f</sup> Isabel Franke,<sup>f</sup>  
Jack D. Wright,<sup>f</sup> Stephen J. Blundell,<sup>f</sup> Francis L. Pratt,<sup>g</sup> Joseph deGeorge,<sup>h</sup> Mark M. Turnbull,<sup>h</sup> Chris P.  
Landee<sup>h</sup>*

<sup>a</sup> Materials Science Division, Argonne National Laboratory, Argonne, IL 60439

<sup>b</sup> X-ray Science Division, Advanced Photon Source, Argonne National Laboratory, Argonne, IL 60439

<sup>c</sup> Department of Chemistry and Biochemistry, Eastern Washington University, Cheney, WA, 99004

<sup>d</sup> National High Magnetic Field Laboratory, Los Alamos National Laboratory, Los Alamos, NM 87545

<sup>e</sup> Department of Chemistry, North Carolina State University, Raleigh, NC 27695-8204

<sup>f</sup> Oxford University Department of Physics, Clarendon Laboratory, Parks Road, Oxford, OX1 3PU, UK

<sup>g</sup> ISIS Facility, Rutherford Appleton Laboratory, Chilton, Oxfordshire OX11 0QX, UK

<sup>h</sup> Carlson School of Chemistry and Department of Physics, Clark University, Worcester, MA 01610

\*Contact information of corresponding author:

Email: [JASchlueter@anl.gov](mailto:JASchlueter@anl.gov)

Phone: (630) 252-3588

**RECEIVED DATE**

TITLE RUNNING HEAD: Structure and Properties of  $\text{CuX}_2(\text{pyzO})(\text{H}_2\text{O})_2$

# Supplemental Material

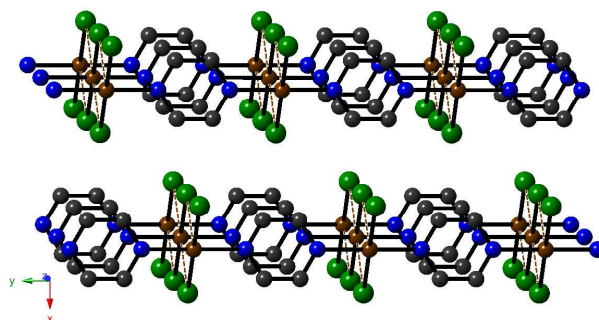

**Figure S1.** Packing diagram of **4**. Dashed lines indicate Cu-Br interactions. Hydrogen atoms omitted for clarity. Compound **3** is isostructural.

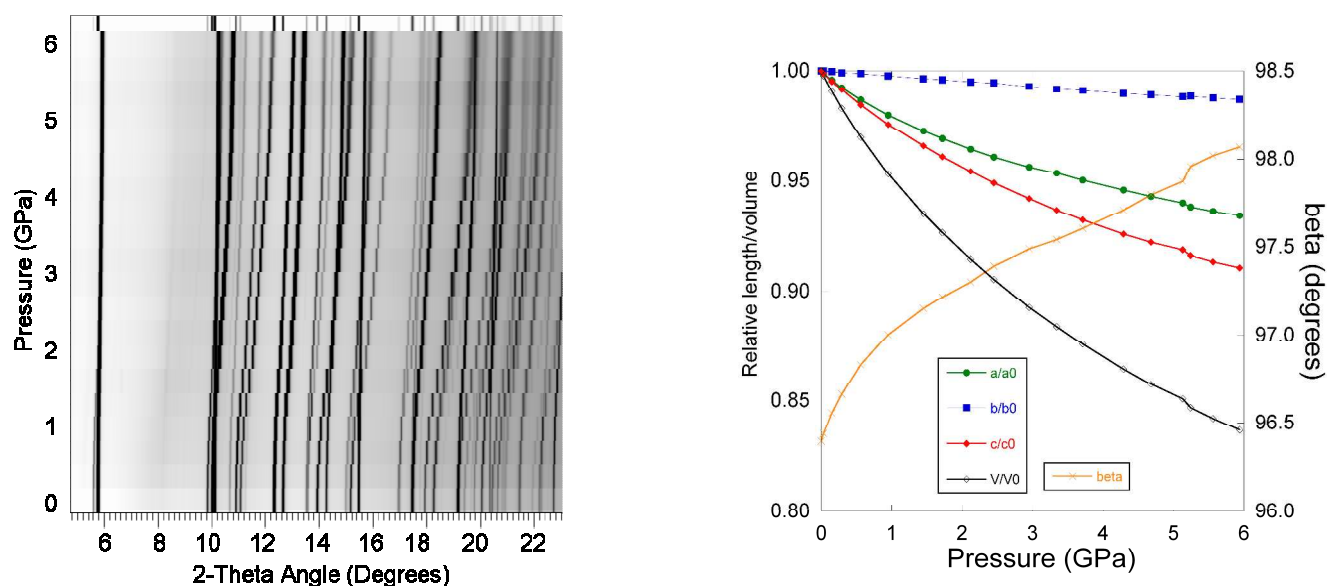

**Figure S2.** Left: X-ray powder diffraction data as a function of pressure for **4**. No phase transitions are observed for pressures up to 6 GPa. The final scan (top of figure) was taken after the sample was returned to ambient pressure at the conclusion of the experiment. Right: Unit cell parameters as a function of pressure.

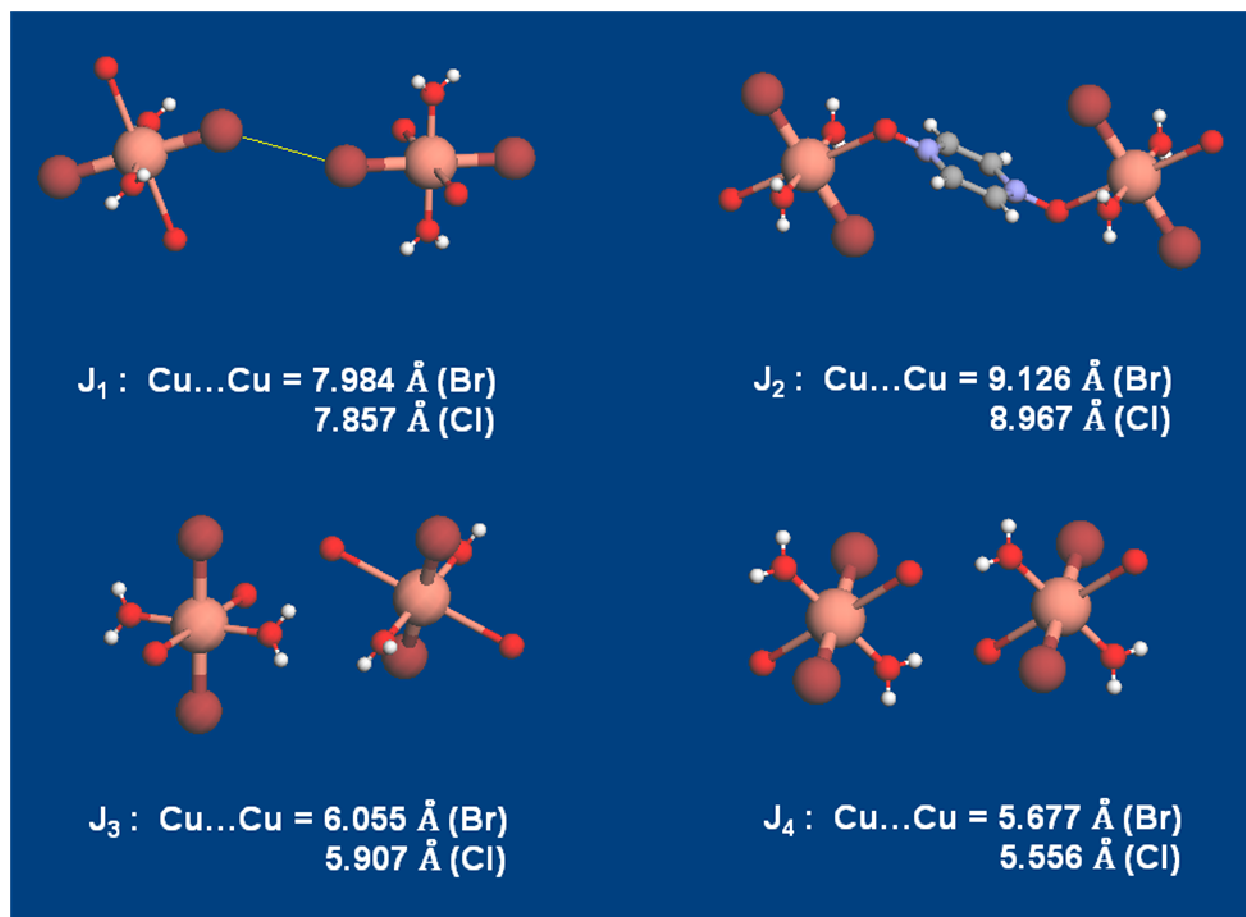

**Figure S3.** Four spin exchange paths  $J_1 - J_4$  considered for  $\text{CuX}_2(\text{pyzo})(\text{H}_2\text{O})_2$  ( $\text{X} = \text{Cl} \text{ \& \; Br}$ )

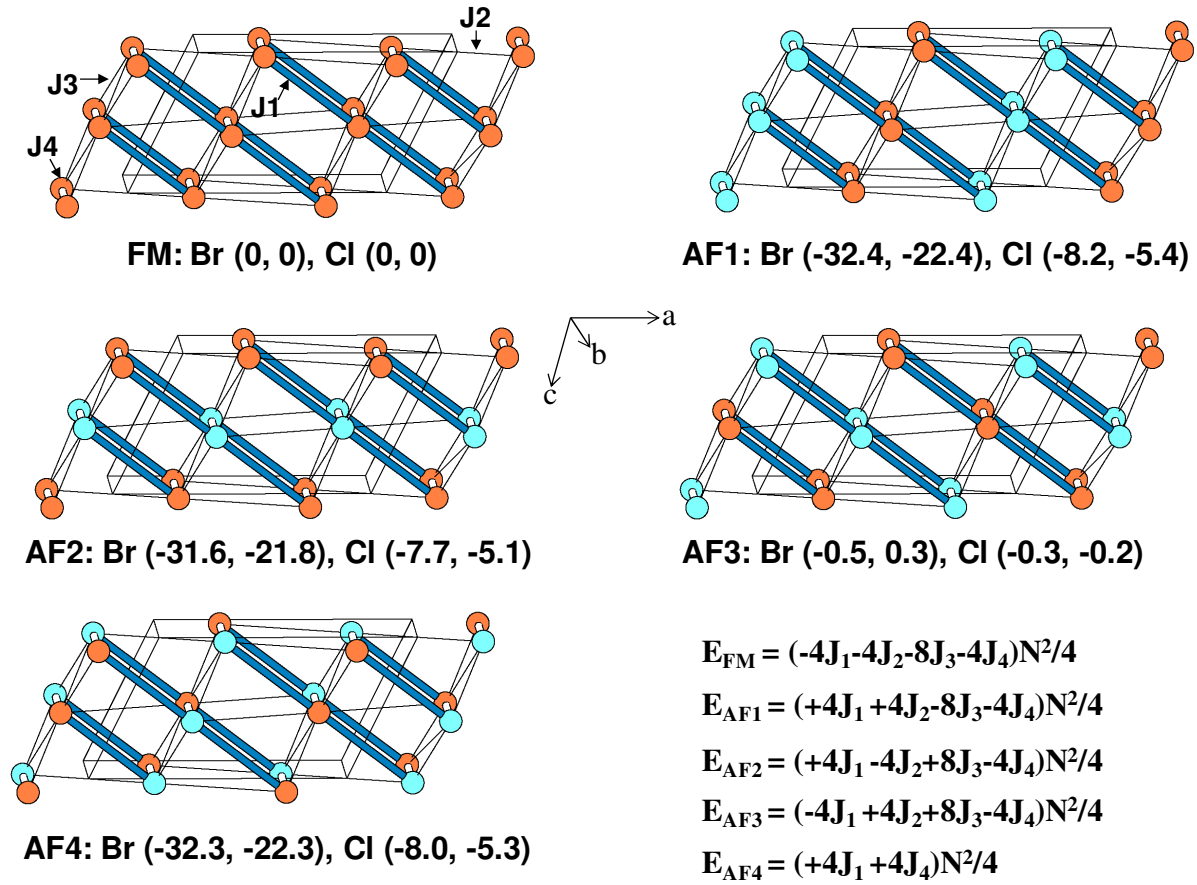

**Figure S4.** Five ordered spin states used to extract the values of  $J_1 - J_4$  of  $\text{CuX}_2(\text{pyzo})(\text{H}_2\text{O})_2$  ( $X = \text{Cl}$  &  $\text{Br}$ ), where the up-spin and down-spin  $\text{Cu}^{2+}$  sites are indicated by brown and cyan circles, respectively. The numbers in each parenthesis (from left to right) refer to the relative energies (in meV per 4 formula units) obtained from the GGA+U calculations with  $U = 4$  and  $6$  eV, respectively. The total spin exchange energies (per 4 formula units) of the five ordered spin states, expressed in terms of  $J_1 - J_4$ , are also given.

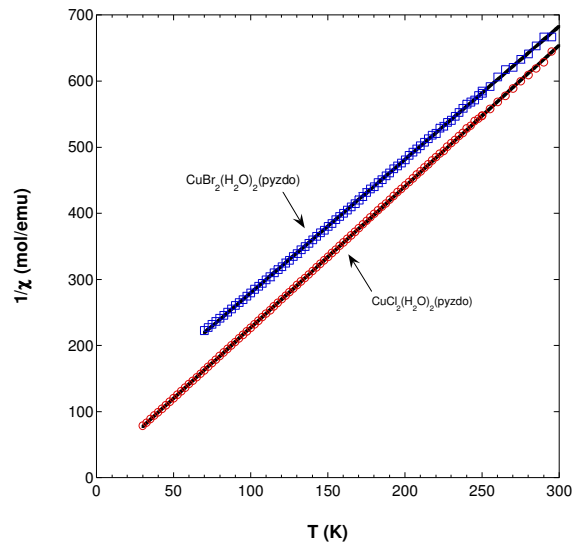

**Figure S5.** Theoretical fits of the reciprocal magnetic susceptibility,  $1/\chi$ , for **1** (red circles) and **2** (blue squares) with a Curie-Weiss law.

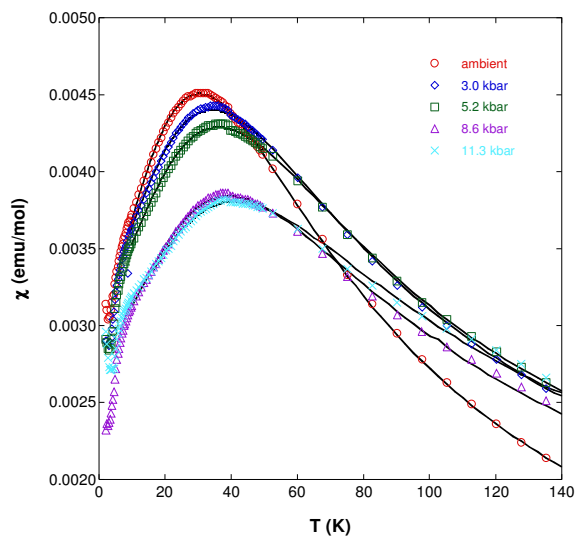

**Figure S6.** Magnetic susceptibility of **4** as a function of pressure. The solid lines represent theoretical fits to the data as described in the text.

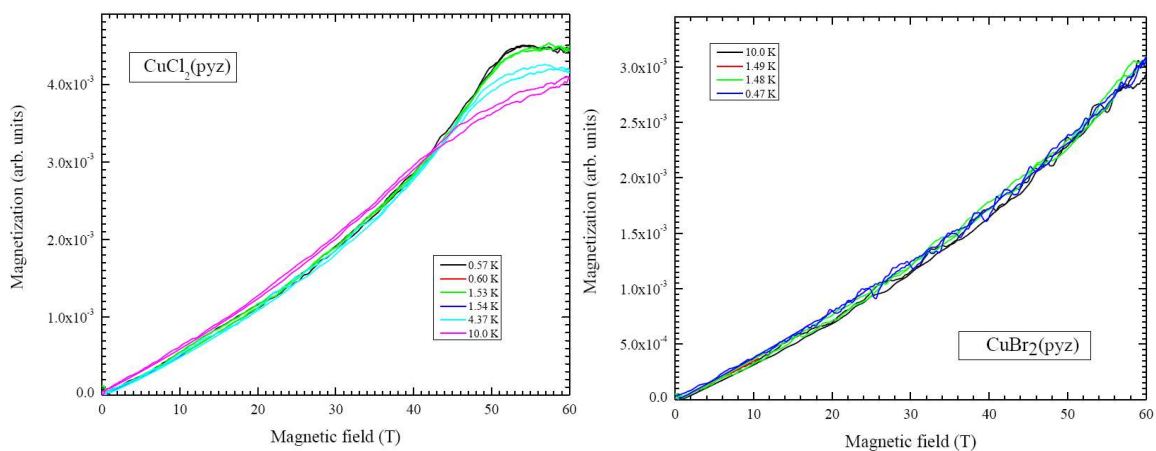

**Figure S7.** Magnetization of **3** and **4** as a function of magnetic field.

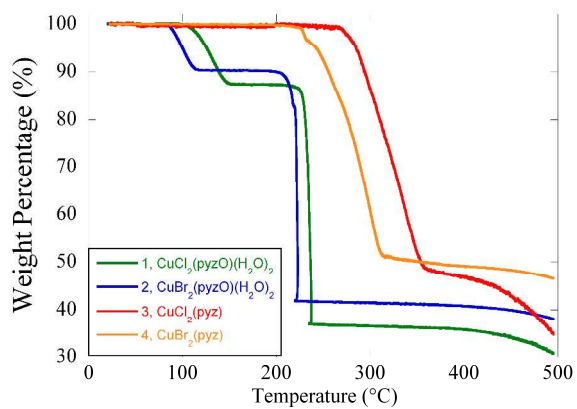

**Figure S8.** Thermogravimetric analysis of compounds **1-4**.

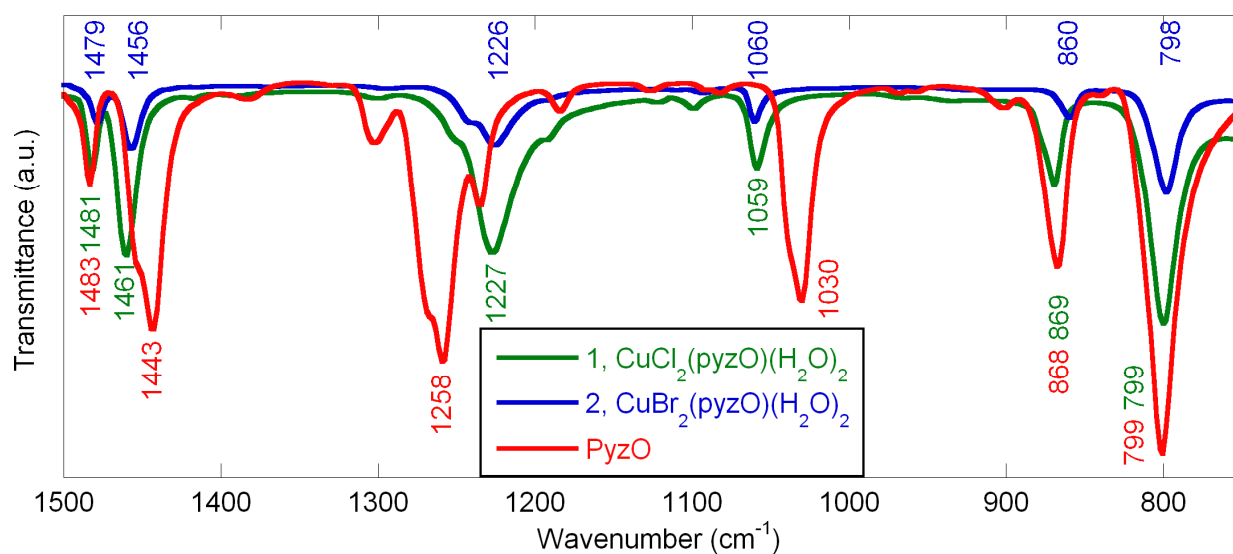

**Figure S9.** Infrared spectra of compounds **1** and **2**, as compared to the non-coordinated  $\text{pyzO}$  ligand.

**Table S1.** Parameters from third-order Birch-Murnaghan equations of state fit to lattice volumes using the EOS-FIT v5.2 program by R. J. Angel.

|          | P-range / GPa | No. data | $V_0 / \text{\AA}^3$ | $K_0 / \text{GPa}$ | $K'$    | $R_u / \%$ | $R_w / \%$ |
|----------|---------------|----------|----------------------|--------------------|---------|------------|------------|
| <b>2</b> | 0-3.3         | 11       | 968(3)               | 16.0(16)           | 8.0(15) | 0.75       | 0.89       |
| <b>4</b> | 0-3.7         | 13       | 329.9(6)             | 16.5(11)           | 8.4(11) | 0.26       | 0.23       |

**Table S2.** Spin exchanges  $J_1 - J_4$  (in  $k_B K$ ) of  $\text{CuX}_2(\text{PyzO})(\text{H}_2\text{O})_2$  ( $X = \text{Cl}, \text{Br}$ ) obtained from GGA+U calculations with  $U = 4$  and 6 eV.

|       | X = Br   |          | X = Cl   |          |
|-------|----------|----------|----------|----------|
|       | U = 4 eV | U = 6 eV | U = 4 eV | U = 6 eV |
| $J_1$ | -184     | -127     | -47      | -31      |
| $J_2$ | -3.7     | -2.5     | -0.5     | -0.4     |
| $J_3$ | 0.4      | 0.4      | 1.0      | 0.7      |
| $J_4$ | -1.5     | -1.0     | -0.6     | -0.4     |
